# Supplementary figures and images for: Neural signatures of perceptual inference
Source: eLife journal article supplement (doi:10.7554/elife.11476), 2016-03-07

Full model space

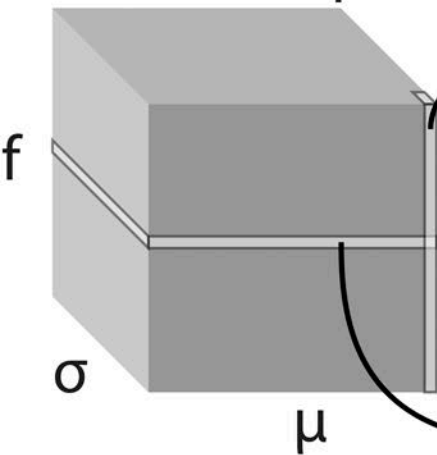

Forward model  
 $P(f|\mu, \sigma)$

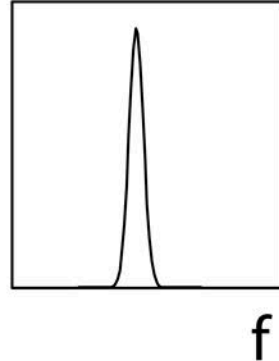

Inverse model  
 $P(\mu, \sigma|f)$

One segment

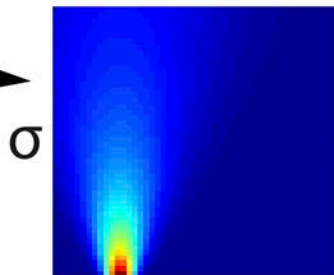

Many segments

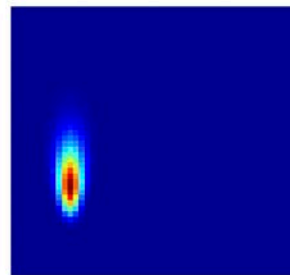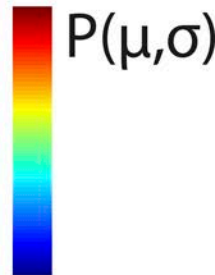

Supplement: supp [file elife_poa_e11476_Figure_2_figure_supplement_1.pdf › elife_poa_e11476_Figure_2_figure_supplement_1.pdf]

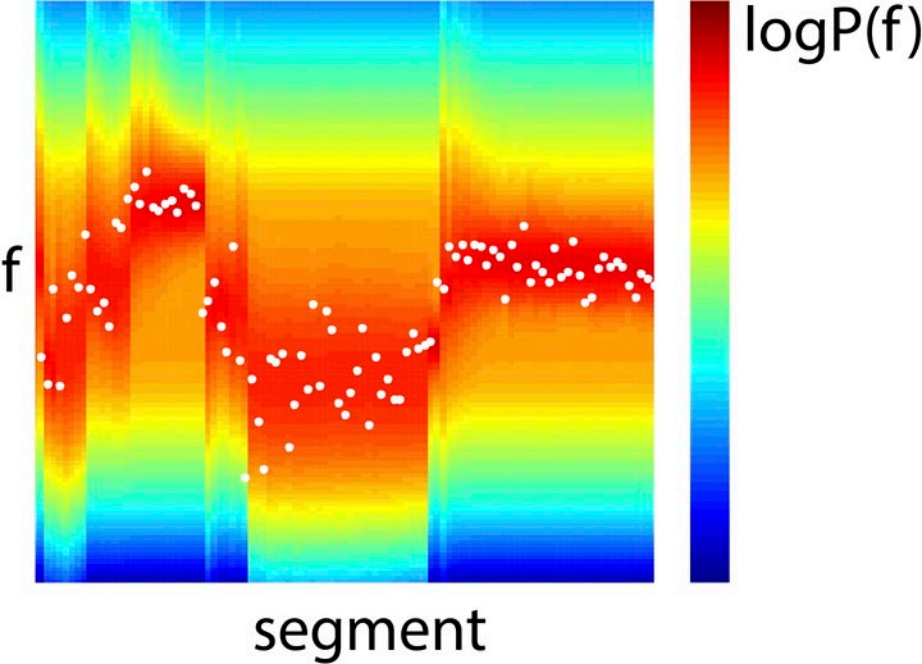

Supplement: supp [file elife_poa_e11476_Figure_2_figure_supplement_2.pdf › elife_poa_e11476_Figure_2_figure_supplement_2.pdf]

Instantaneous

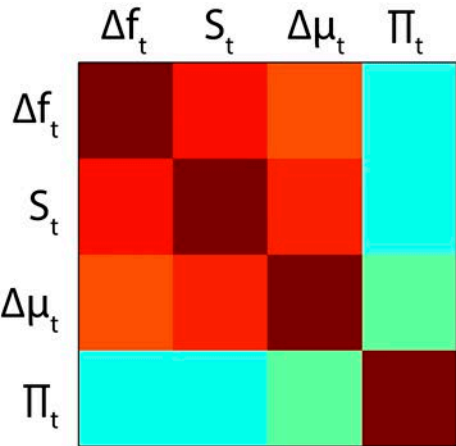

One lag

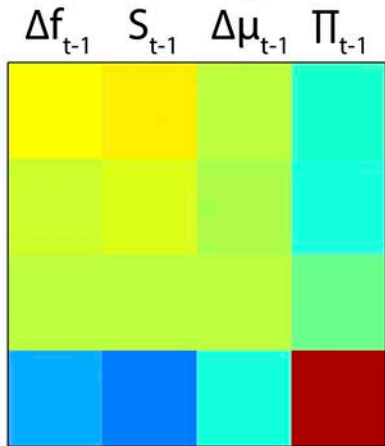

Two lags

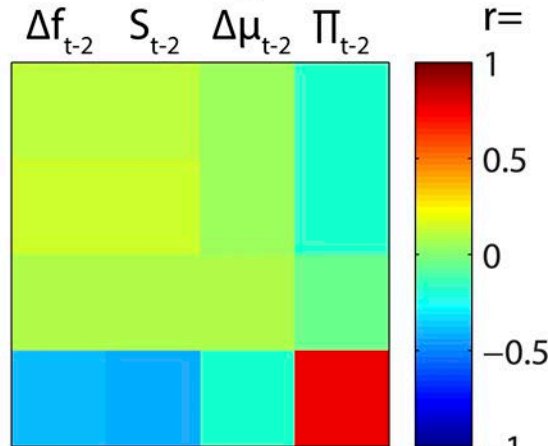

Supplement: supp [file elife_poa_e11476_Figure_2_figure_supplement_3.pdf › elife_poa_e11476_Figure_2_figure_supplement_3.pdf]

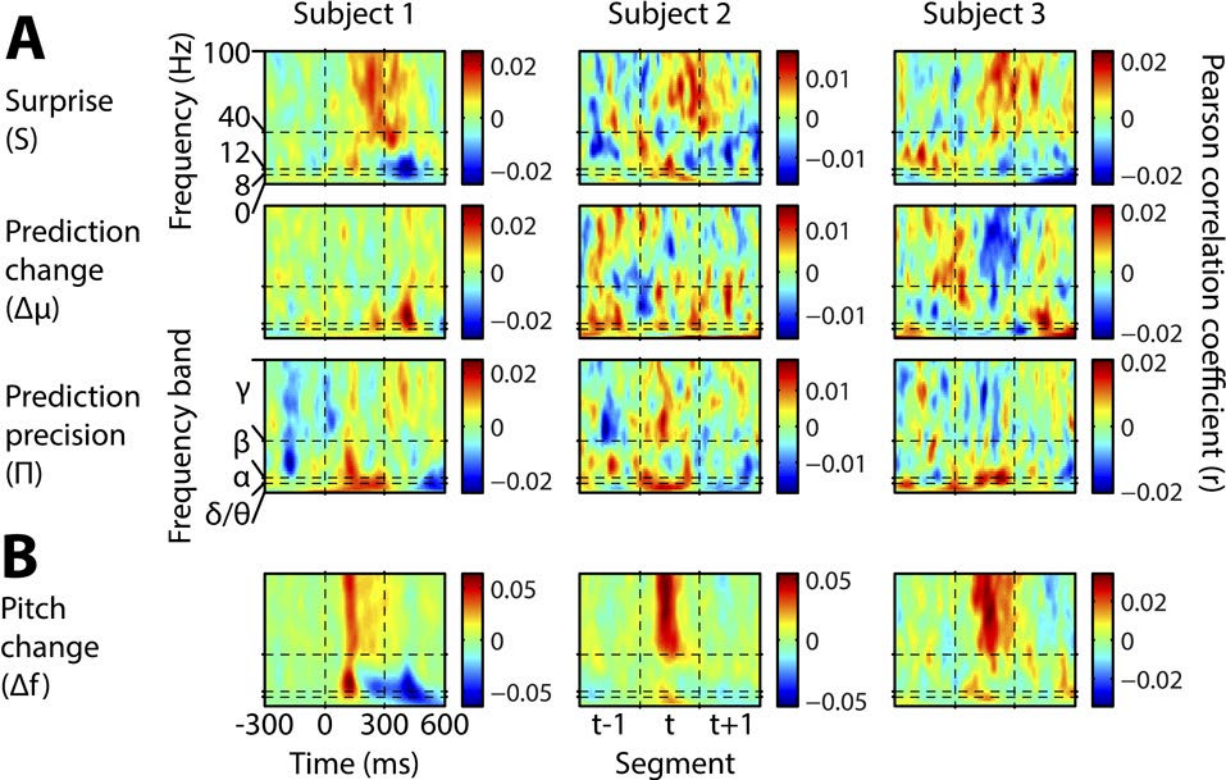

Supplement: supp [file elife_poa_e11476_Figure_4_figure_supplement_1.pdf › elife_poa_e11476_Figure_4_figure_supplement_1.pdf]

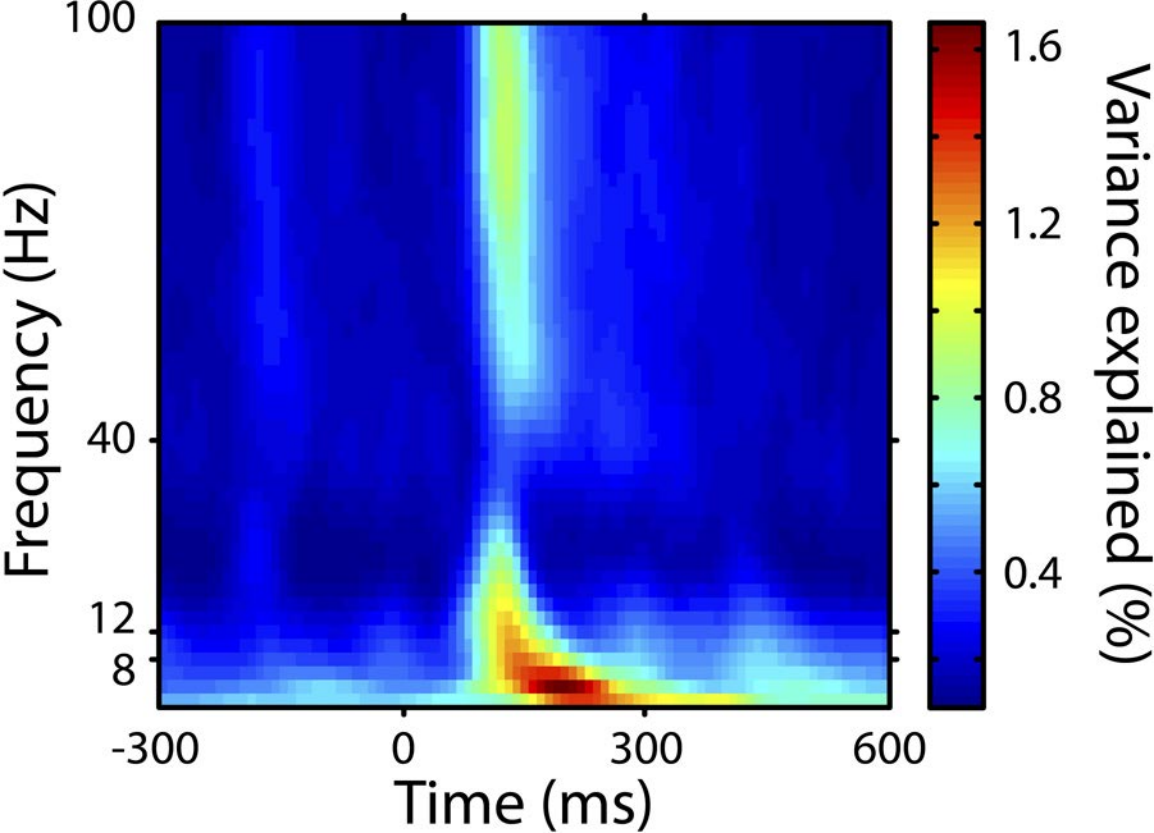

Supplement: supp [file elife_poa_e11476_Figure_4_figure_supplement_2.pdf › elife_poa_e11476_Figure_4_figure_supplement_2.pdf]

# Induced correlates

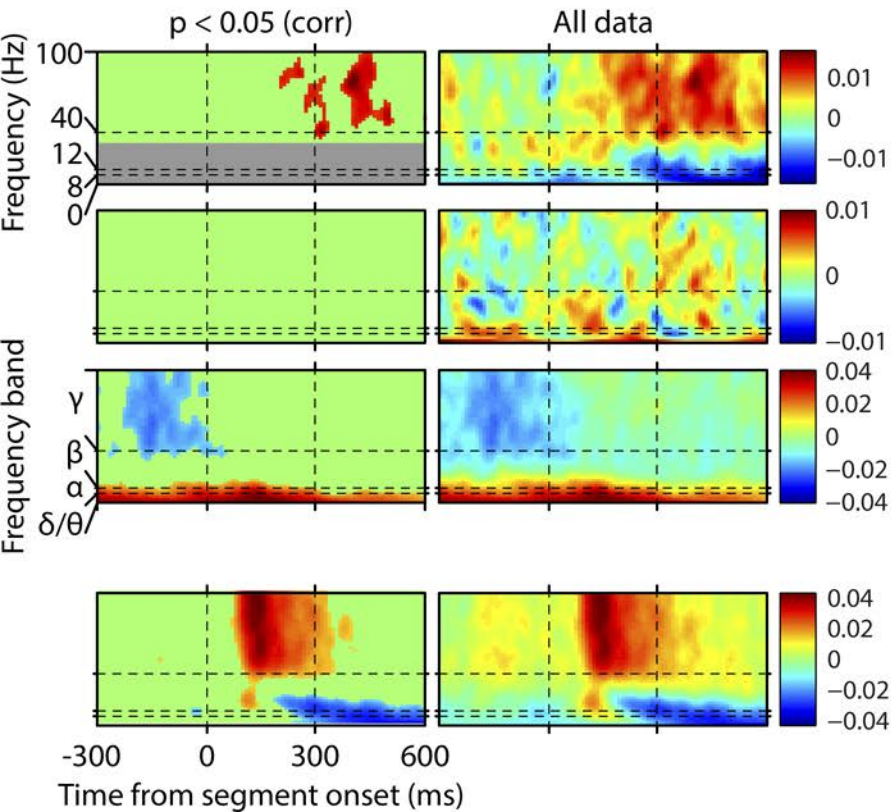

# Evoked correlates

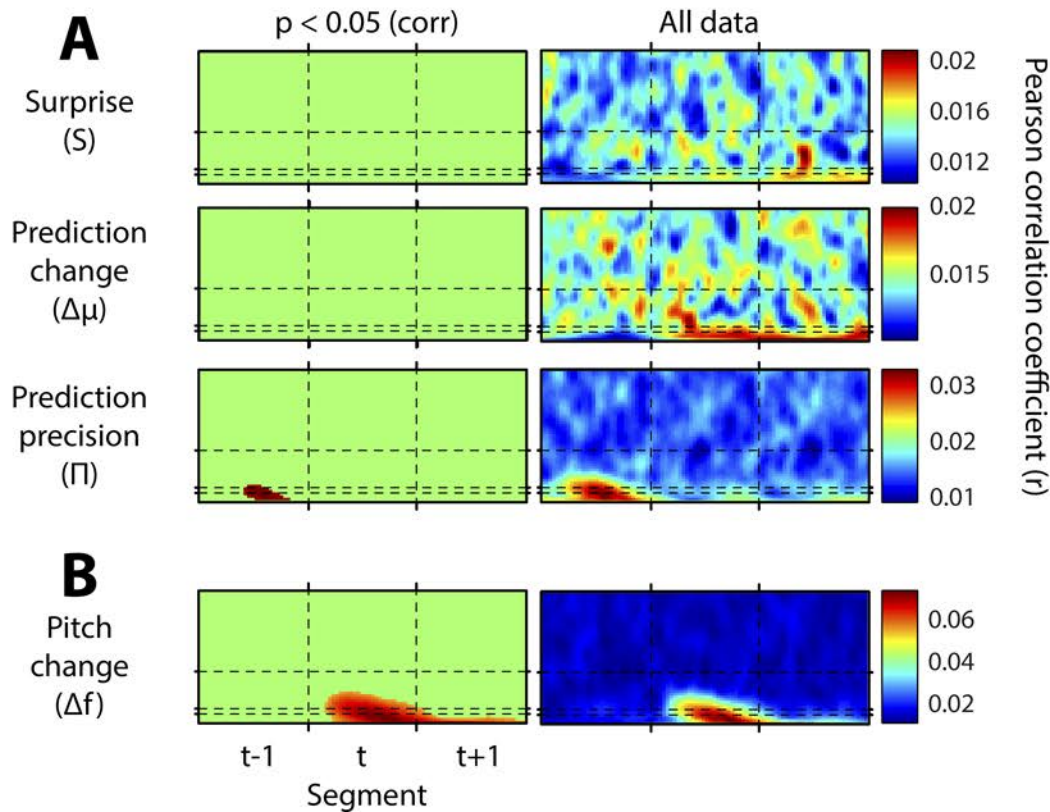

Supplement: supp [file elife_poa_e11476_Figure_4_figure_supplement_3.pdf › elife_poa_e11476_Figure_4_figure_supplement_3.pdf]

## Induced correlates

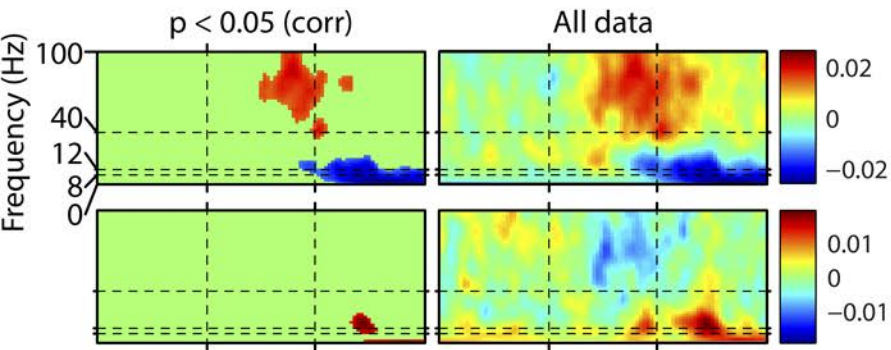

## Evoked correlates

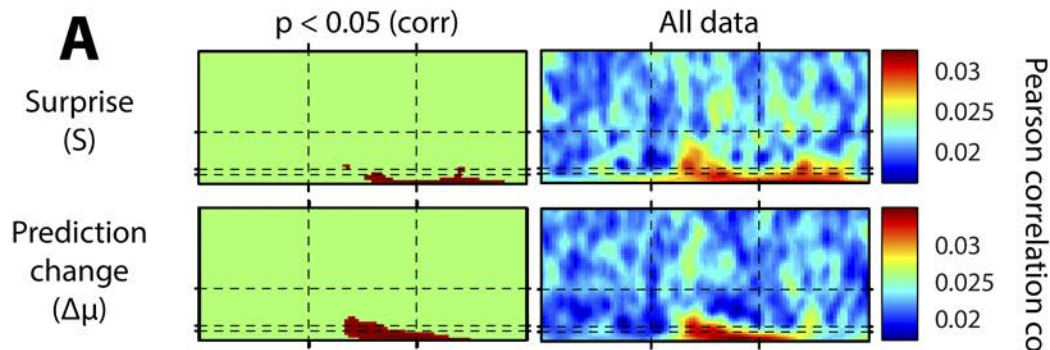

Prediction precision ( $\Pi$ ) omitted from analysis

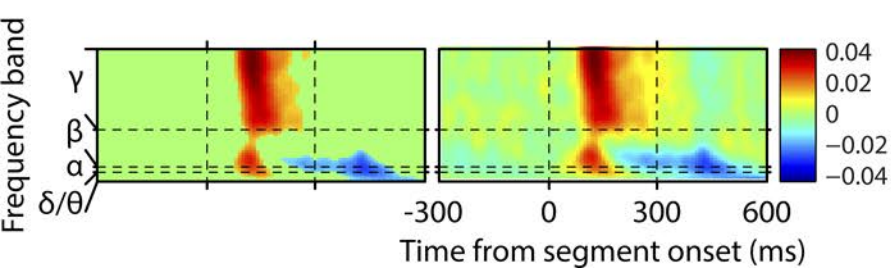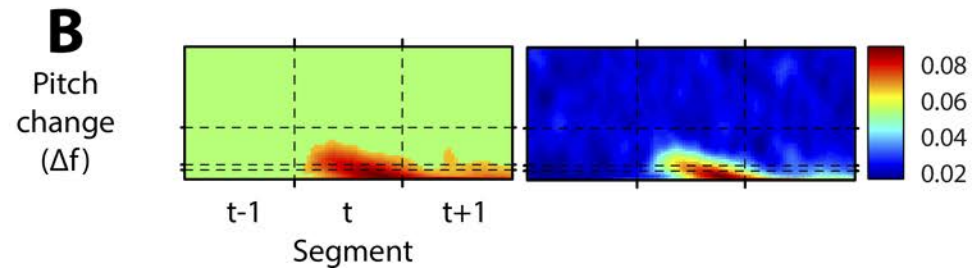

Supplement: supp [file elife_poa_e11476_Figure_4_figure_supplement_4.pdf › elife_poa_e11476_Figure_4_figure_supplement_4.pdf]

Subject 1

Lateral  
surface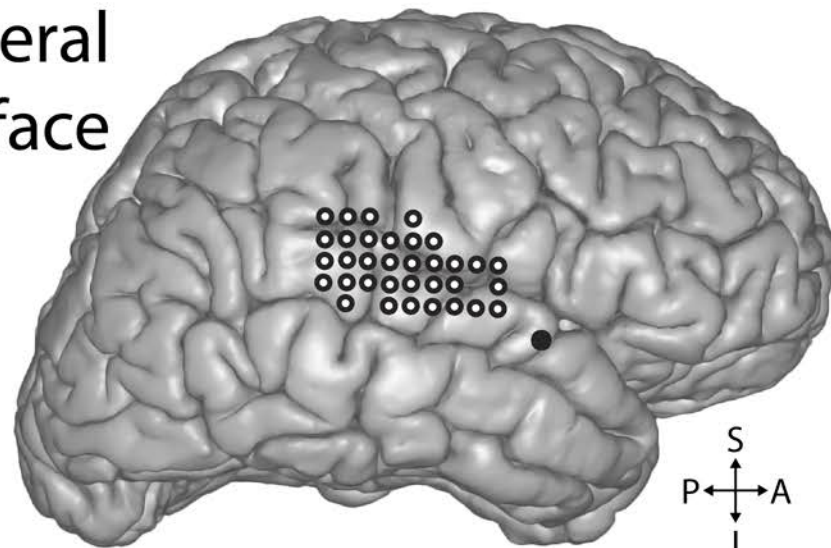Heschl's  
gyrus  
(HG)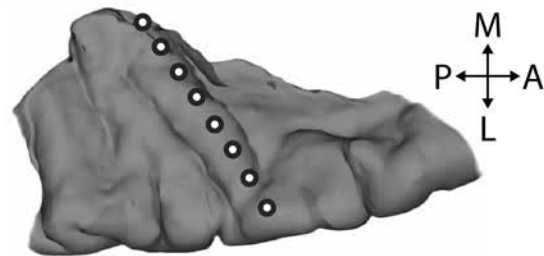

Subject 2

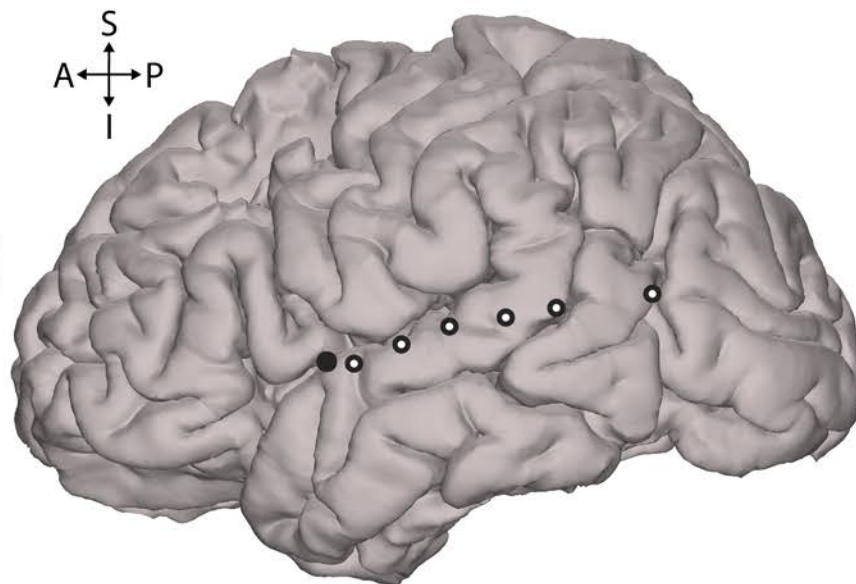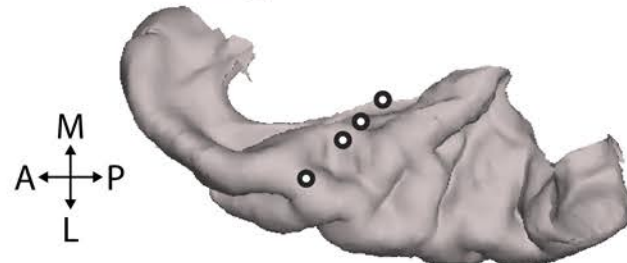

Subject 3

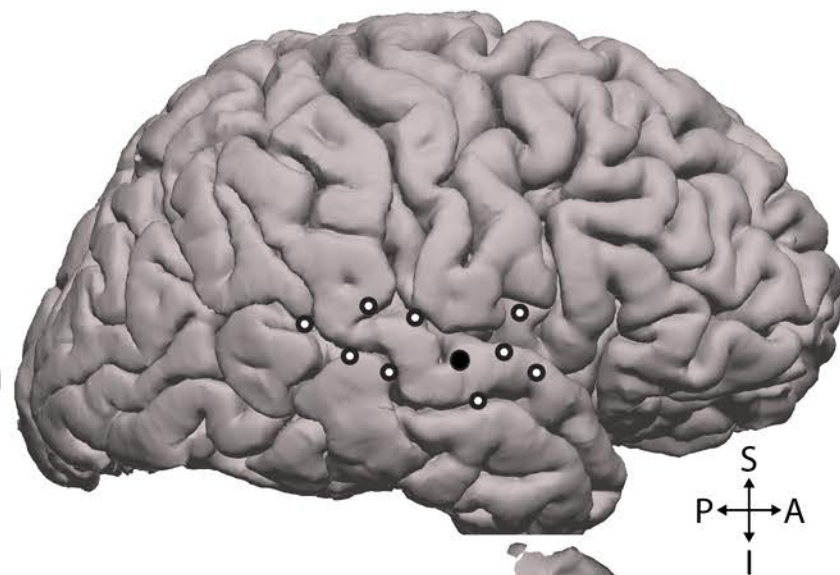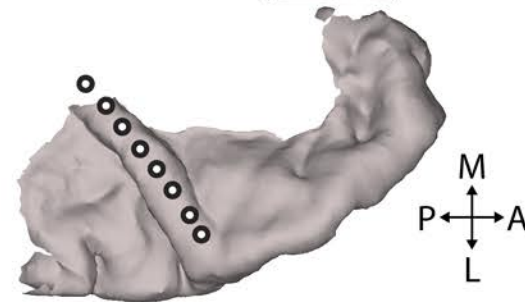

Supplement: supp [file elife_poa_e11476_Figure_4_figure_supplement_5.pdf › elife_poa_e11476_Figure_4_figure_supplement_5.pdf]

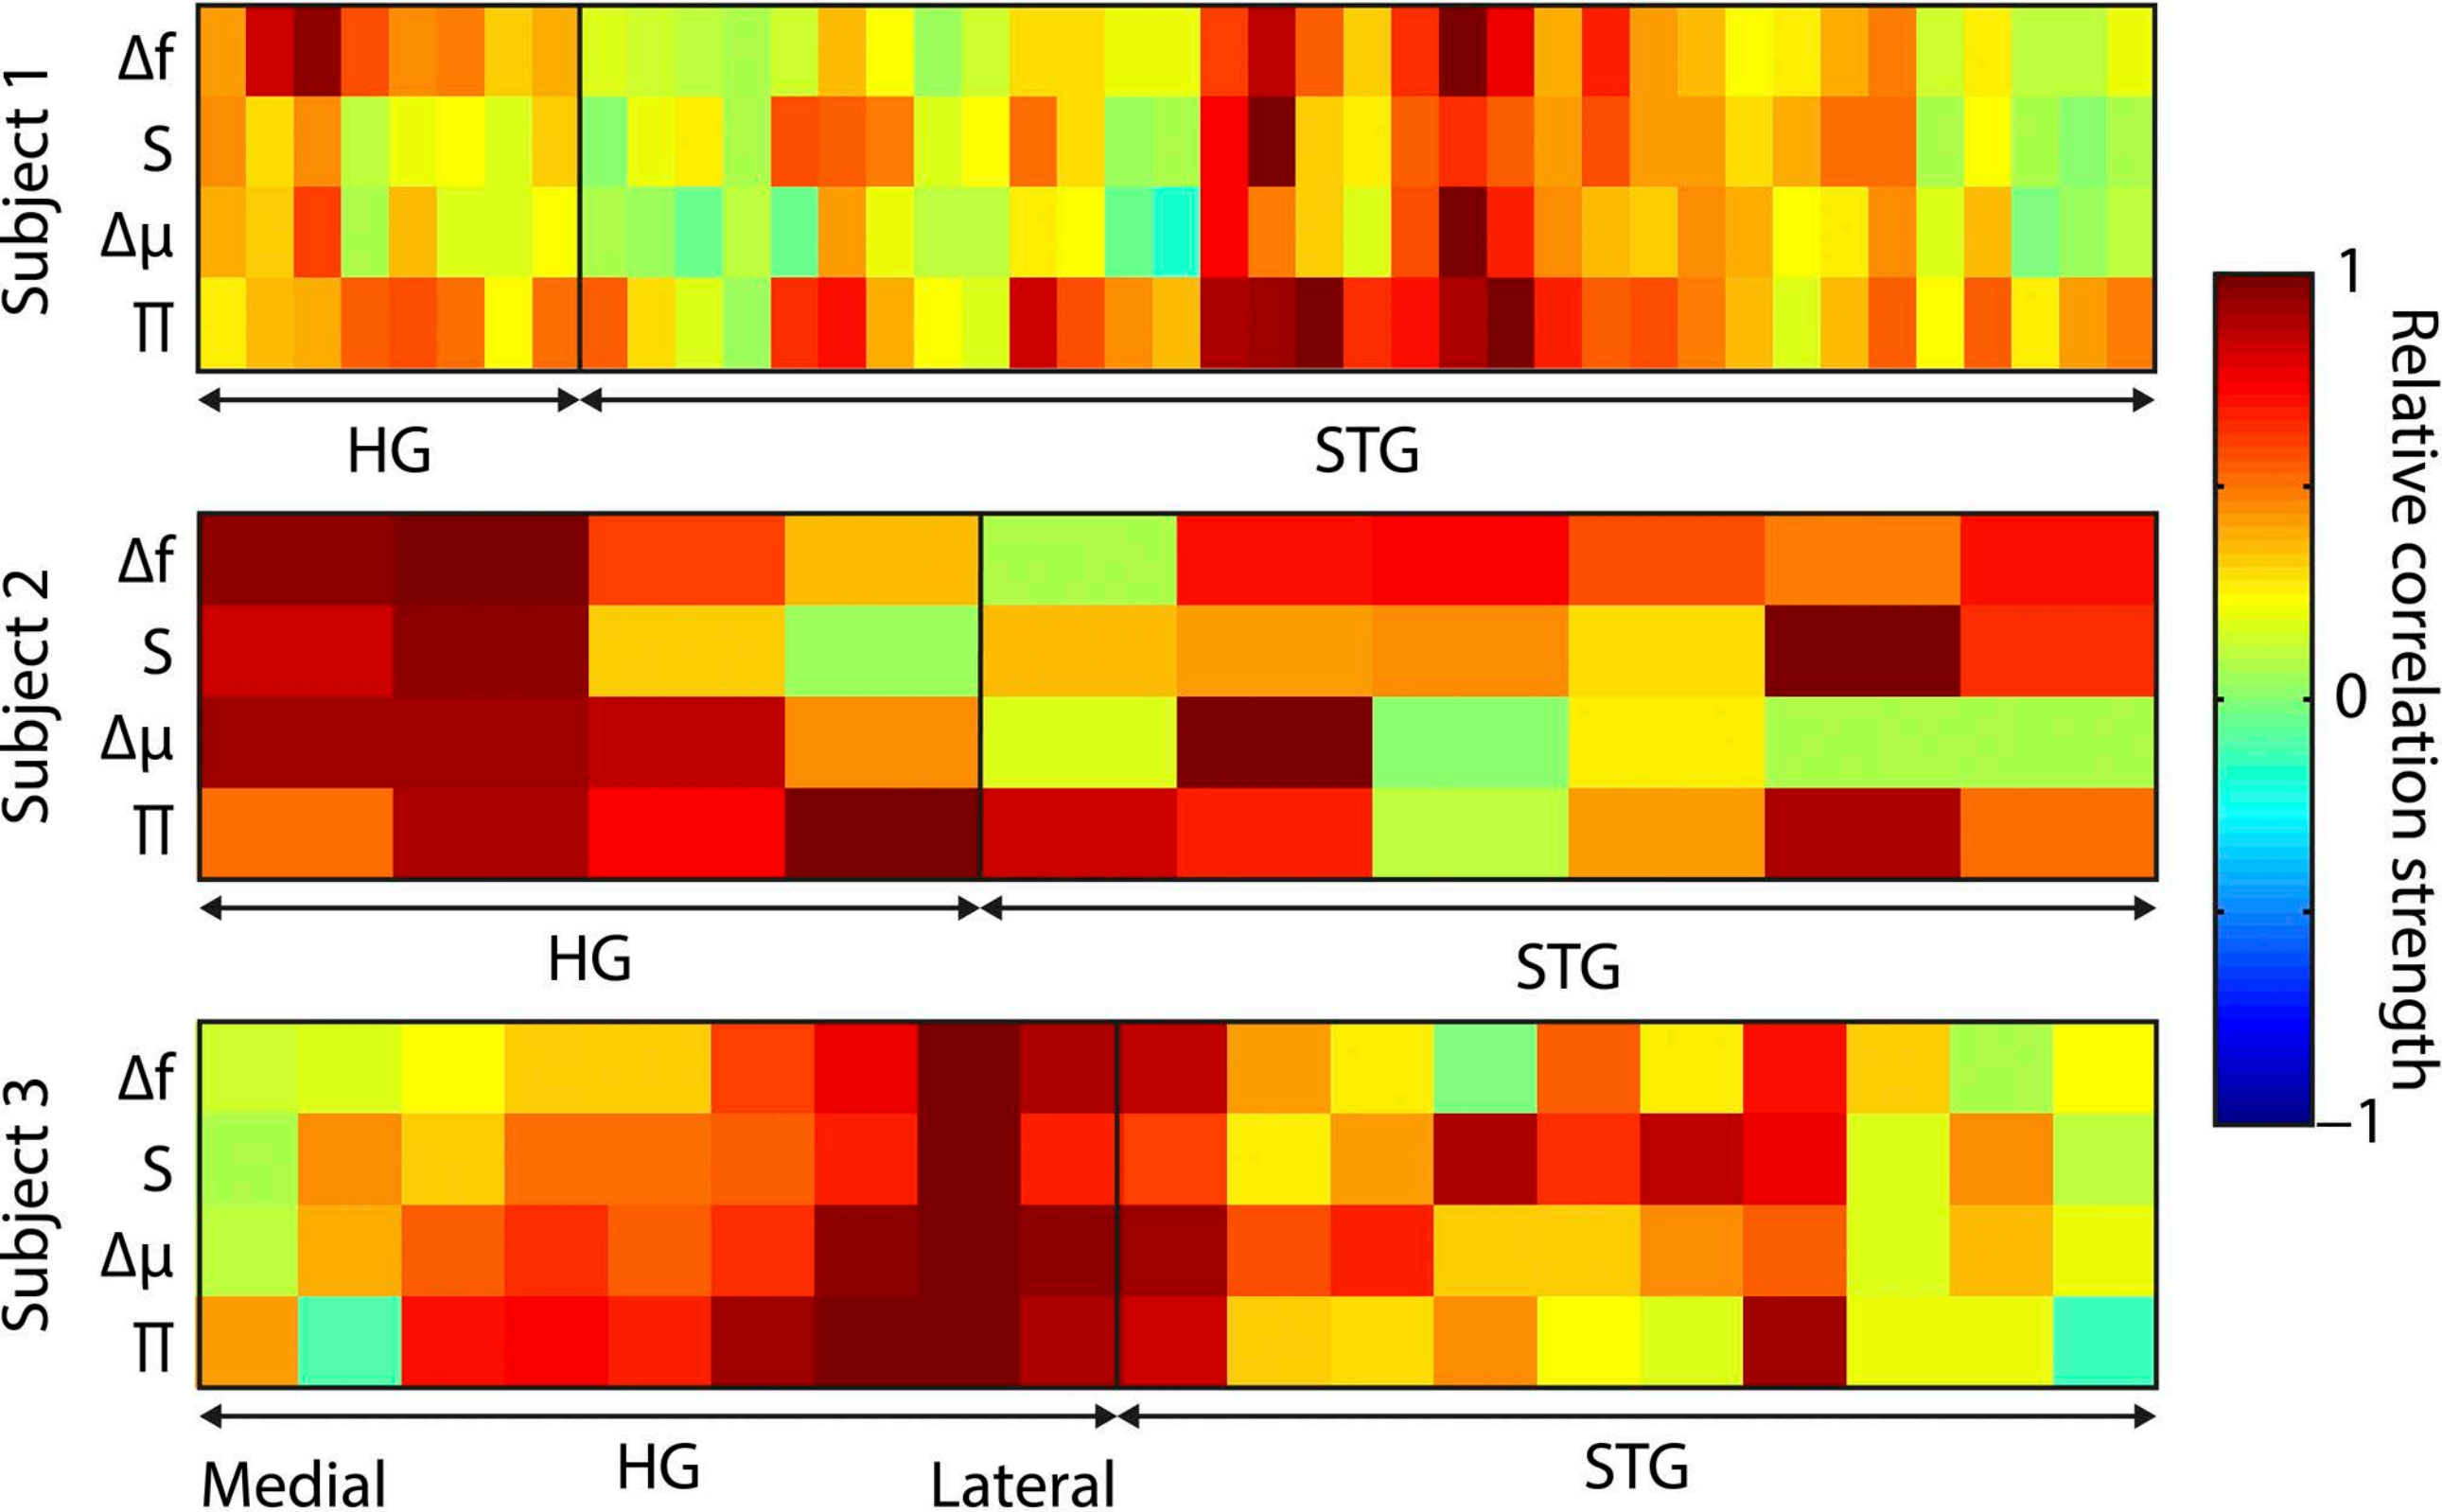

Supplement: supp [file elife_poa_e11476_Figure_4_figure_supplement_6.pdf › elife_poa_e11476_Figure_4_figure_supplement_6.pdf]
